# Supplementary material for: Dysregulated Immune Responses in COVID-19 Patients Correlating With Disease Severity and Invasive Oxygen Requirements
Source: PubMed Central journal article supplement (PMC8567168; doi:10.3389/fimmu.2021.769059), 2021-10-21

# Supplementary Figure 3

A.

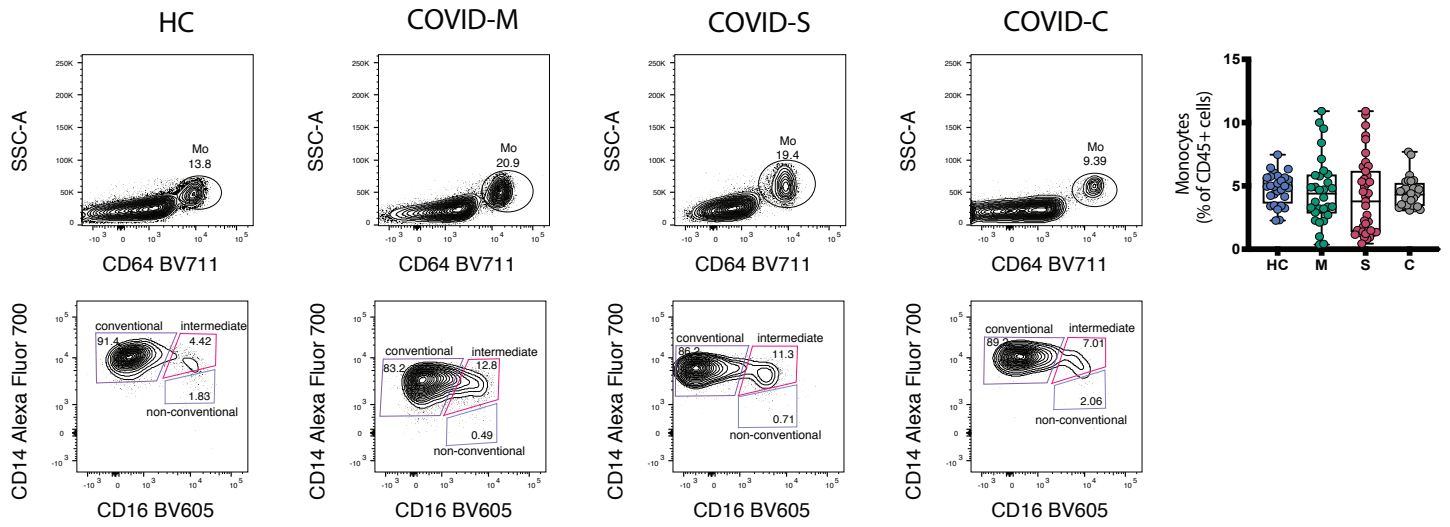

B.

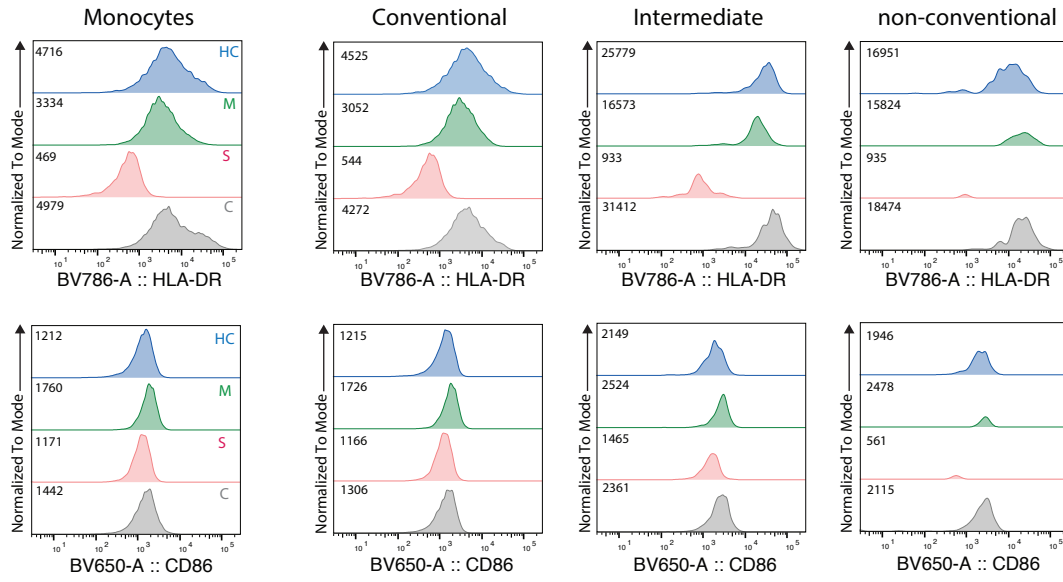

C.

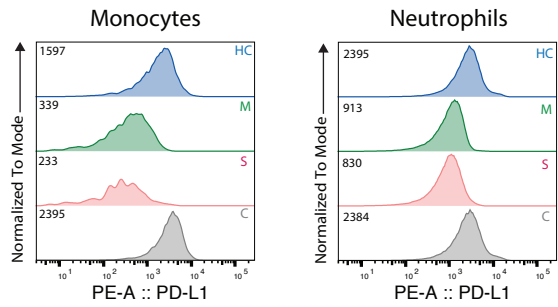

Supplement: DataSheet_3.pdf [file DataSheet_3.pdf]
